# Supplementary material for: GROND: a quality-checked and publicly available database of full-length 16S-ITS-23S rRNA operon sequences
Source: PubMed Central journal article supplement (PMC11261877; doi:10.1099/mgen.0.001255), 2024-06-07
Supplement: mgen-10-01255-s001.pdf [file mgen-10-01255-s001.pdf]

## Supplementary Material

Table S1. Phylum-level distribution of genomes containing at least one unlinked *rrn* sequence. RefSeq genome assemblies and taxonomy labels are used and only phyla with > 10 genomes are shown.

| <b>Phylum</b>               | <b># Genomes</b> | <b>% Genomes Containing<br/>Unlinked <i>rrn</i> Operons</b> |
|-----------------------------|------------------|-------------------------------------------------------------|
| Deinococcus-Thermus         | 73               | 76.71                                                       |
| Candidatus Thermoplasmatota | 14               | 50                                                          |
| Planctomycetes              | 57               | 42.11                                                       |
| Spirochaetes                | 234              | 33.33                                                       |
| Proteobacteria              | 16221            | 2.82                                                        |
| Crenarchaeota               | 95               | 2.11                                                        |
| Firmicutes                  | 6236             | 0.55                                                        |
| Bacteroidetes               | 1026             | 0.49                                                        |
| Actinobacteria              | 2689             | 0.26                                                        |
| Tenericutes                 | 452              | 0.22                                                        |

Table S2. *In silico* prediction of primer sensitivity. Sensitivity is expressed as the percentage of sequences in the database predicted to generate an amplicon using each primer pair.

| <b>Dataset</b> | <b>Database</b> | <b>Primer Pair</b> | <b>Sensitivity (%)</b> |
|----------------|-----------------|--------------------|------------------------|
| GTDB           | Full            | 16S:27F-23S:2241R  | 97.13417878            |
|                |                 | 16S:27F-23S:2428R  | 95.94872411            |
|                |                 | 16S:519F-23S:2428R | 97.01714345            |
|                | NR 99.9%        | 16S:27F-23S:2241R  | 95.35632891            |
|                |                 | 16S:27F-23S:2428R  | 93.31769095            |
|                |                 | 16S:519F-23S:2428R | 95.32171053            |
| RefSeq         | Full            | 16S:27F-23S:2241R  | 97.85839628            |
|                |                 | 16S:27F-23S:2428R  | 96.83854006            |
|                |                 | 16S:519F-23S:2428R | 97.67725623            |
|                | NR 99.9%        | 16S:27F-23S:2241R  | 96.51476867            |
|                |                 | 16S:27F-23S:2428R  | 94.7624718             |
|                |                 | 16S:519F-23S:2428R | 96.48185259            |
